# Supplementary material
Source: PubMed Central journal article supplement (PMC2723014)
Supplement: blood-2008-09-179788_1.pdf [file blood-2008-09-179788_1.pdf]

| GENE         | SENSE                               | ANTISENSE                         |
|--------------|-------------------------------------|-----------------------------------|
| SCF          | CTG GAA GAA GAG ACA GCC AAG TC      | AAA GTC ATG GGT AGC AAG AAC AG    |
| GM-CSF       | TTT ACT TTT CCT GGG CAT TGT GGT C   | CCG CAT AGG TGG TAA CTT GTG TTT C |
| G-CSF        | CGA AGG CTT CCC TGA GTG GCT GCT CTA | GGA CAC CTC CTG CCC GGC GCT GG    |
| M-CSF        | GGCTGGCTTGGCTTGGGATGATTCT           | GTCTGTCAGTCTCTGCCTGGATGCTG        |
| OPN          | CGA CGA TGA TGA CGA TGA TGA T       | CTG GCT TTG GAA CTT GCT TGA C     |
| SDF-1        | CGC TCT GCA TCA GTG ACG GTA         | GTT CTT AGC GTG CAA CAA TC        |
| TGF $\alpha$ | GGACAGCTCGCTCTGCTAGCG               | CTTCTCATGTCTGCAGACGAG             |
| FGF1         | ACCGAGAGGTTCAACCTGCC                | GCCATAGTGAGTCCGAGGACC             |
| GAPDH        | CAA CAG CAA CTC CCA CTC TTC C       | ATG TAG GCC ATG AGG TCC ACC       |
